# Supplementary material for: “Interchangeability” of PD-L1 immunohistochemistry assays: a meta-analysis of diagnostic accuracy
Source: PubMed Central journal article supplement (PMC6927905; doi:10.1038/s41379-019-0327-4), 2019-08-05

**Figure 2** Ventana PD-L1 (SP142) (candidate) vs. PD-L1 IHC pharmDx 22C3 (RS) for 50% TPS Cut-off

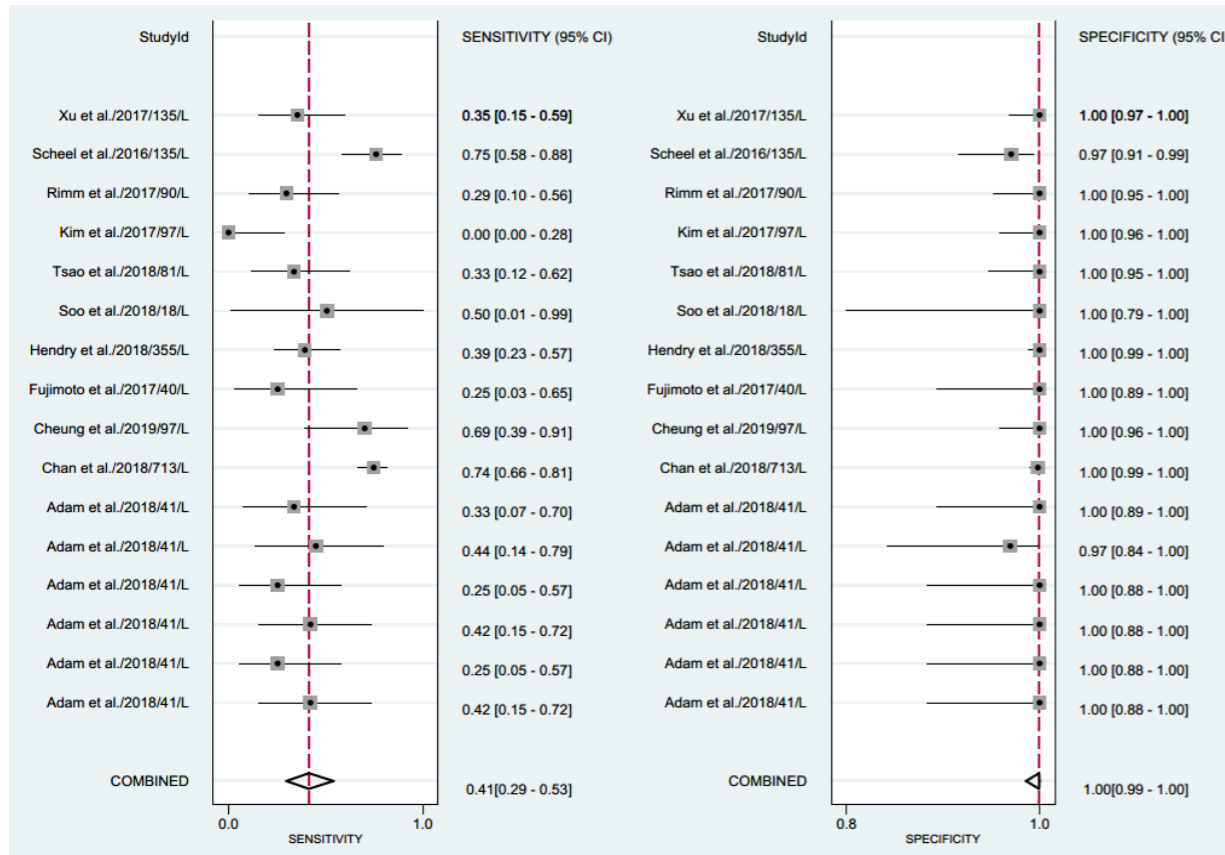

**Figure 3** Ventana PD-L1 (SP142) (candidate) vs. PD-L1 IHC pharmDx 22C3 (RS) for 1% TPS Cut-off

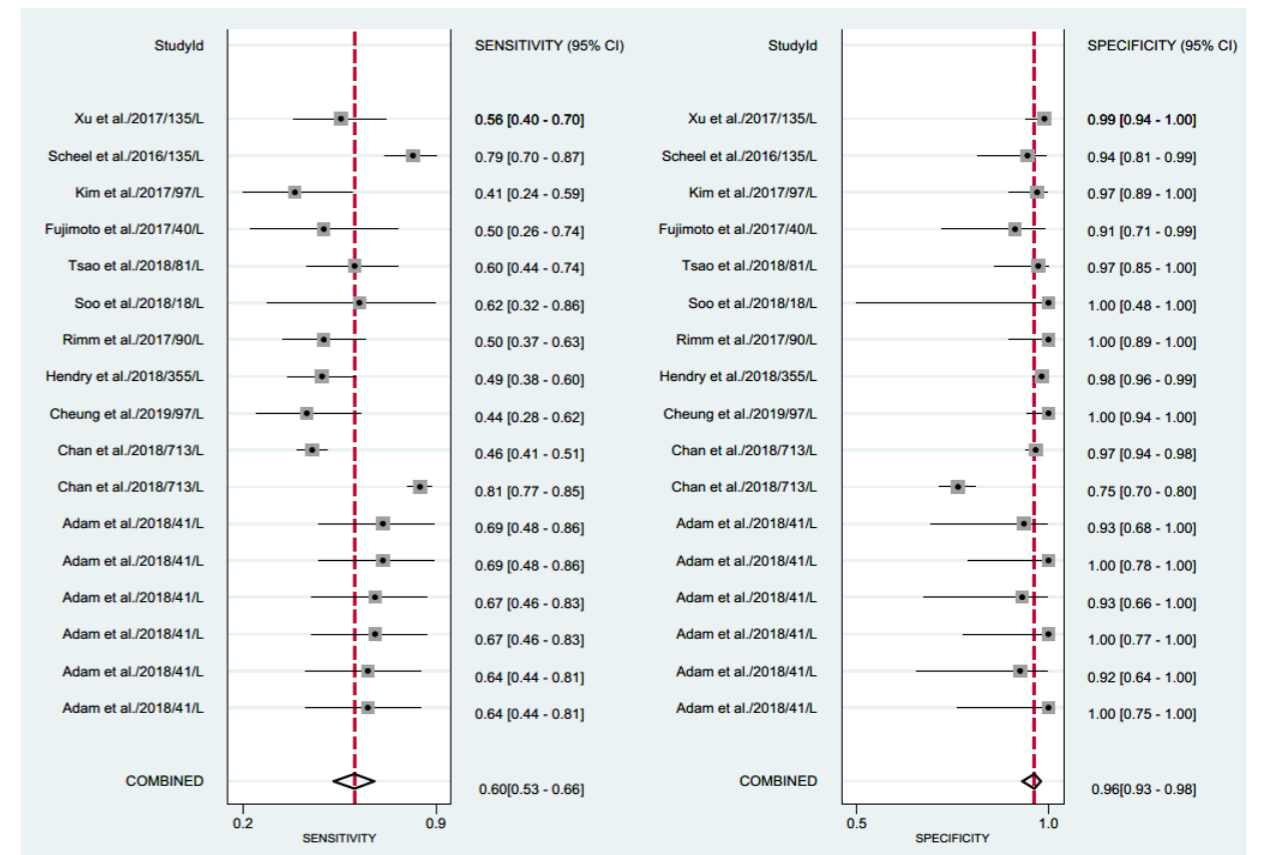

**Figure 4** Ventana PD-L1 (SP142) (candidate) vs. PD-L1 IHC pharmDx 22C3 (RS) for 1% TPS Cut-off

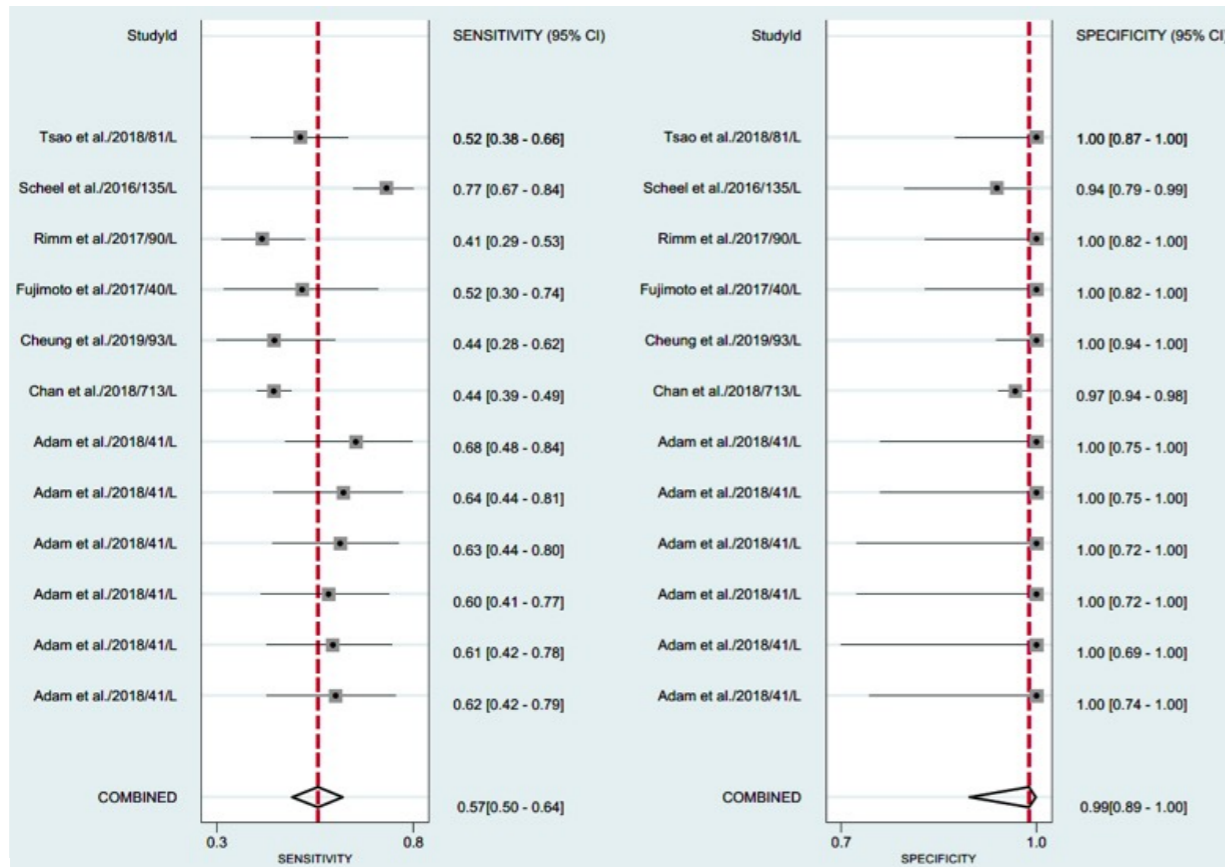

**Figure 5** E1L3N LDT (candidate) vs. PD-L1 IHC pharmDx 28-8 (RS) for 1% TPS Cut-off

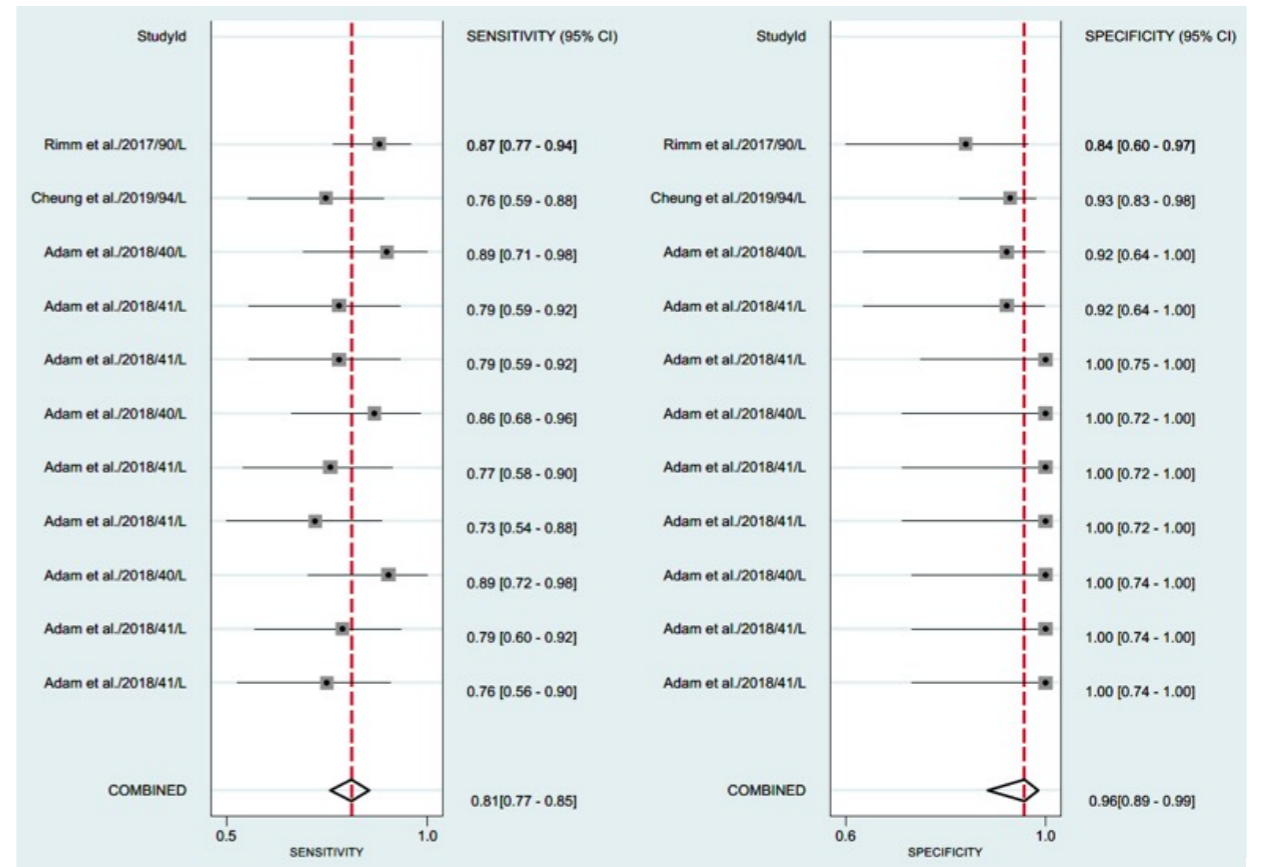



# Figure 6

PD-L1 IHC pharmDx 22C3 (candidate) vs. Ventana PD-L1 (SP263) (RS) for 50% TPS Cut-off

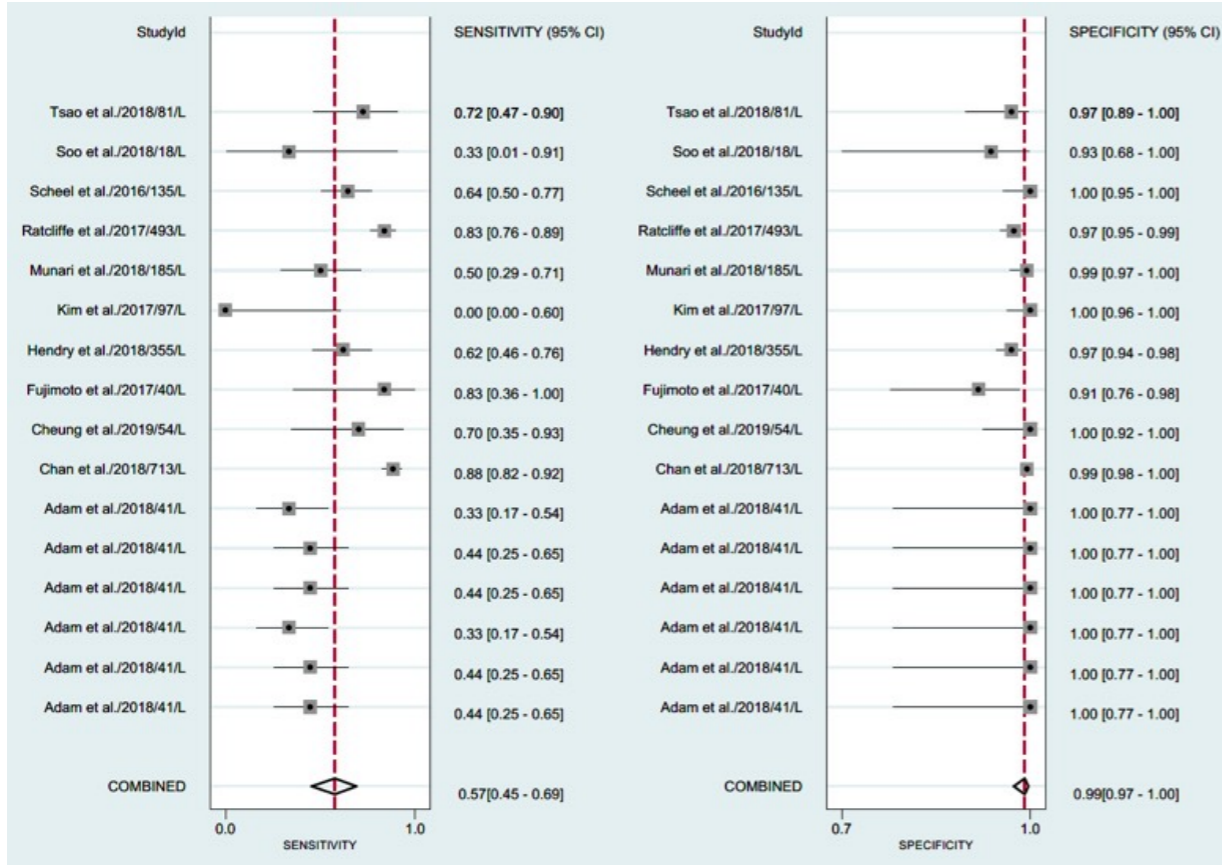

# Figure 7

PD-L1 IHC pharmDx 22C3 (candidate) vs. Ventana PD-L1 (SP263) (RS) for 1% TPS Cut-off

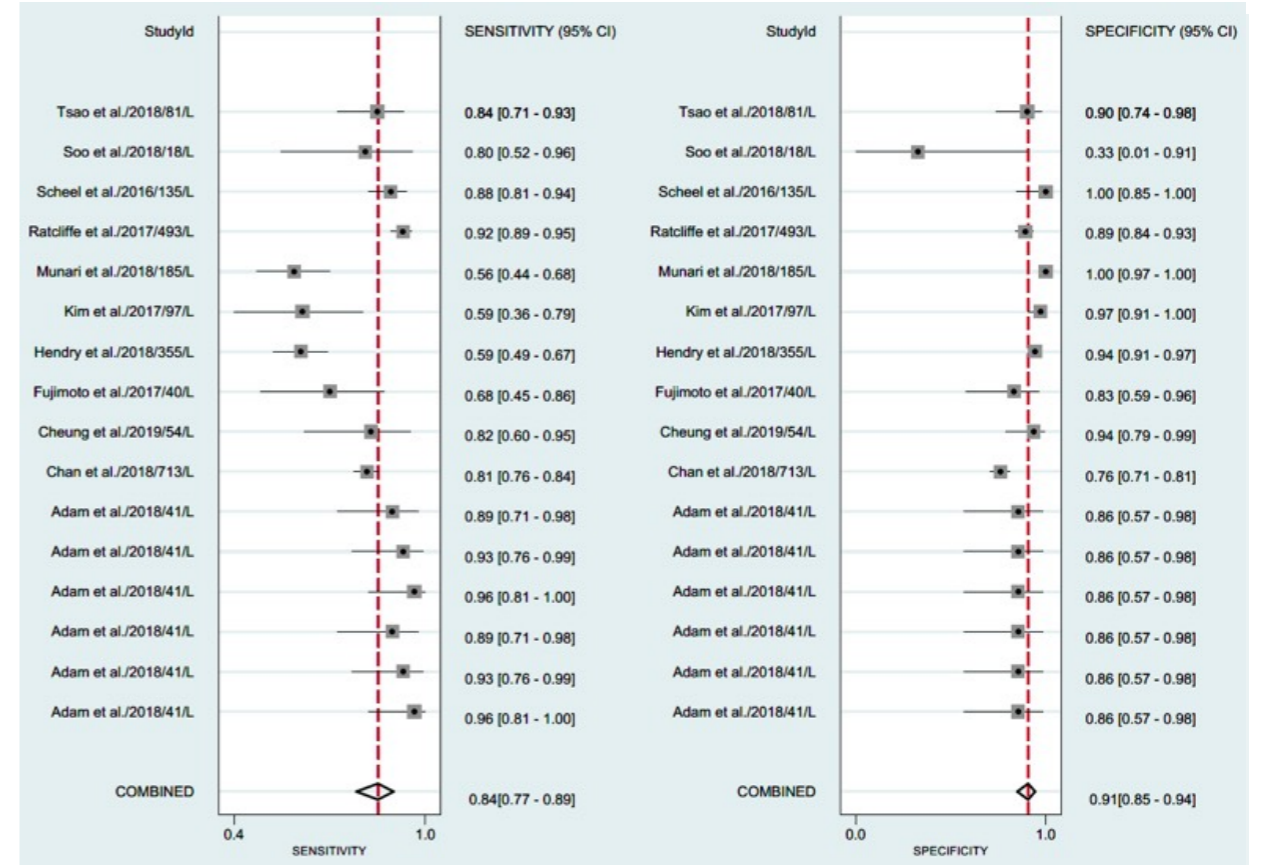

# Figure 8

PD-L1 IHC pharmDx 28-8 (candidate) vs. Ventana PD-L1 (SP263) (RS) for 50% TPS Cut-off

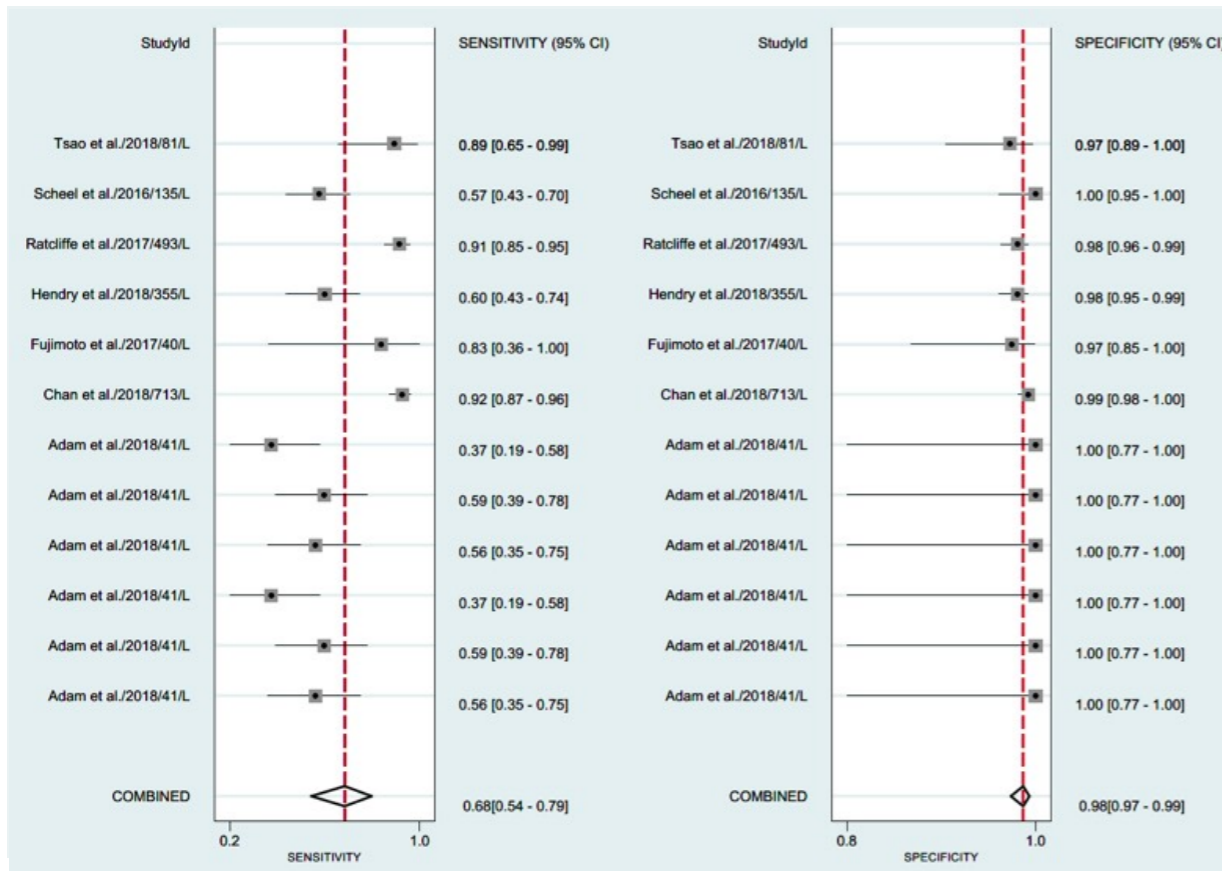

# Figure 9

PD-L1 IHC pharmDx 28-8 (candidate) vs. Ventana PD-L1 (SP263) (RS) for 1% TPS Cut-off

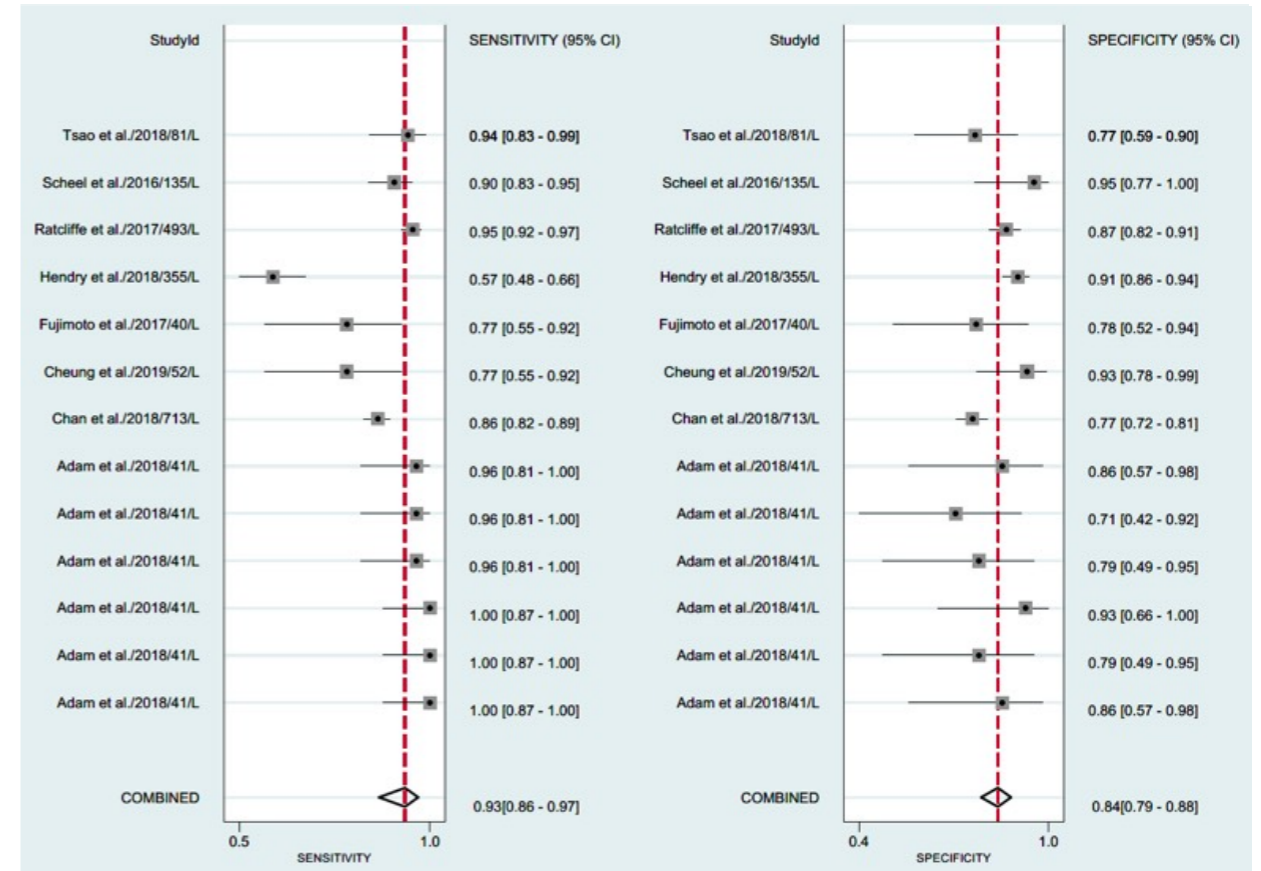



**Figure 10** Ventana PD-L1 (SP142) (candidate) vs. Ventana PD-L1 (SP263) (RS) for 1% TPS Cut-off

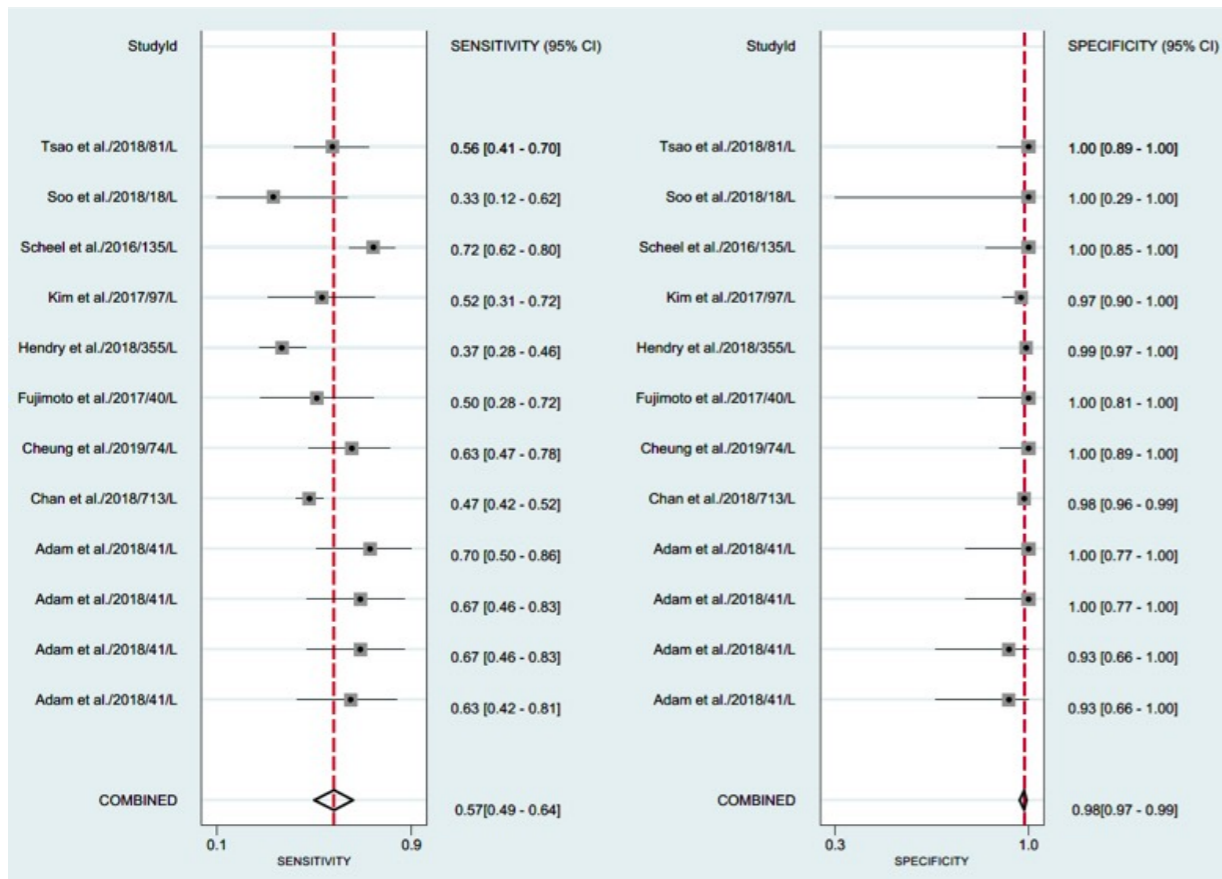

**Figure 11** E1L3N LDT (candidate) vs. Ventana PD-L1 (SP263) (RS) for 1% TPS Cut-off

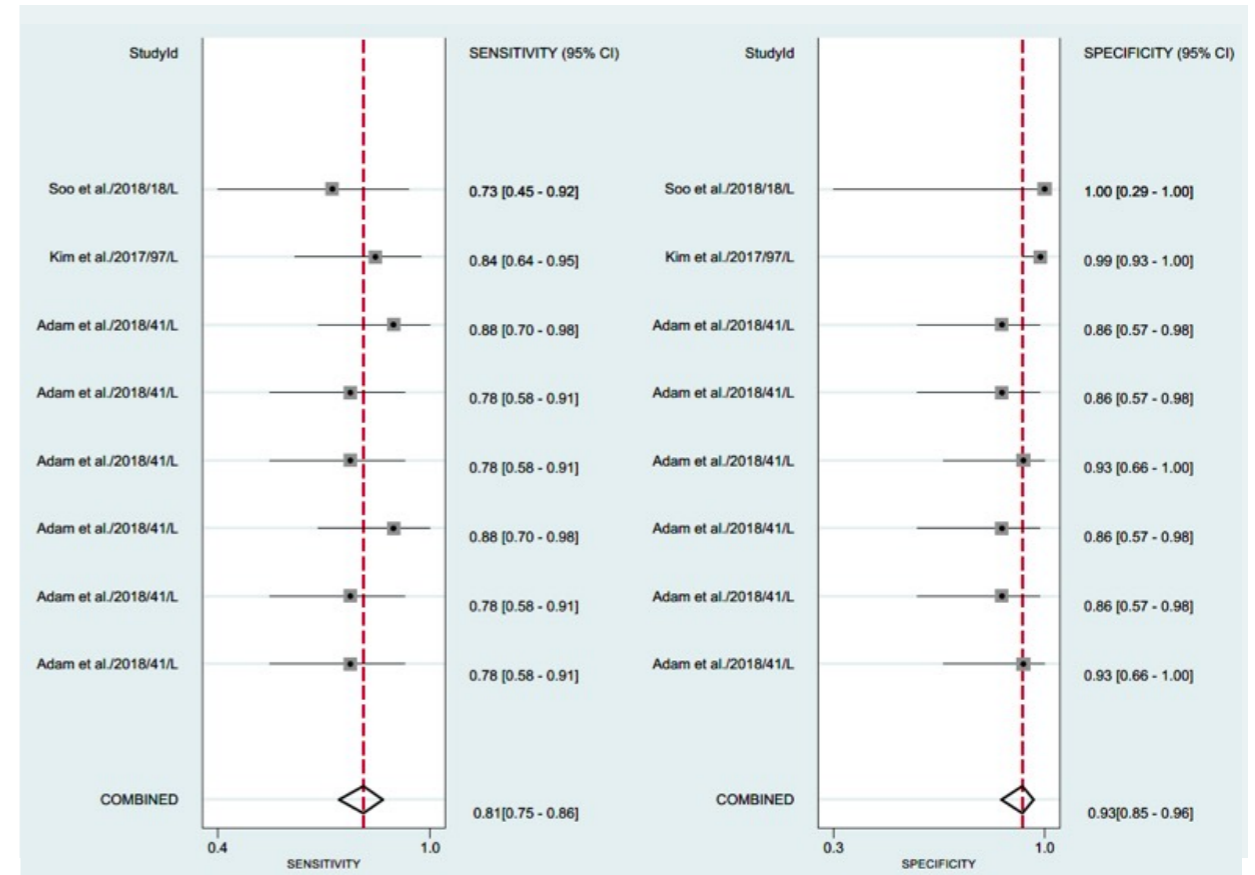

**Figure 12** 28-8 LDT (candidate) vs. PD-L1 IHC pharmDx 28-8 (RS) at 1% TPS Cut-off

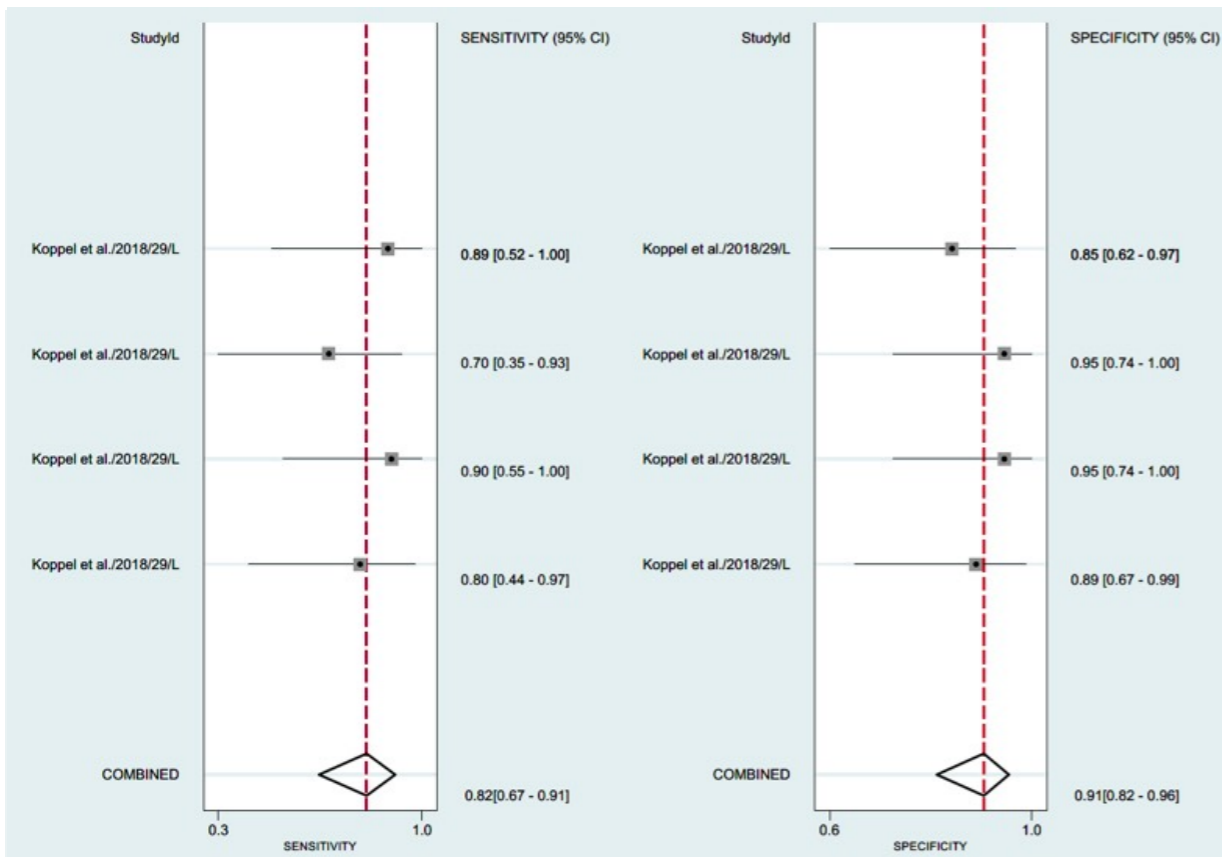

**Figure 13** 28-8 LDT (candidate) vs. PD-L1 IHC pharmDx 22C3 (RS) at 50% TPS Cut-off

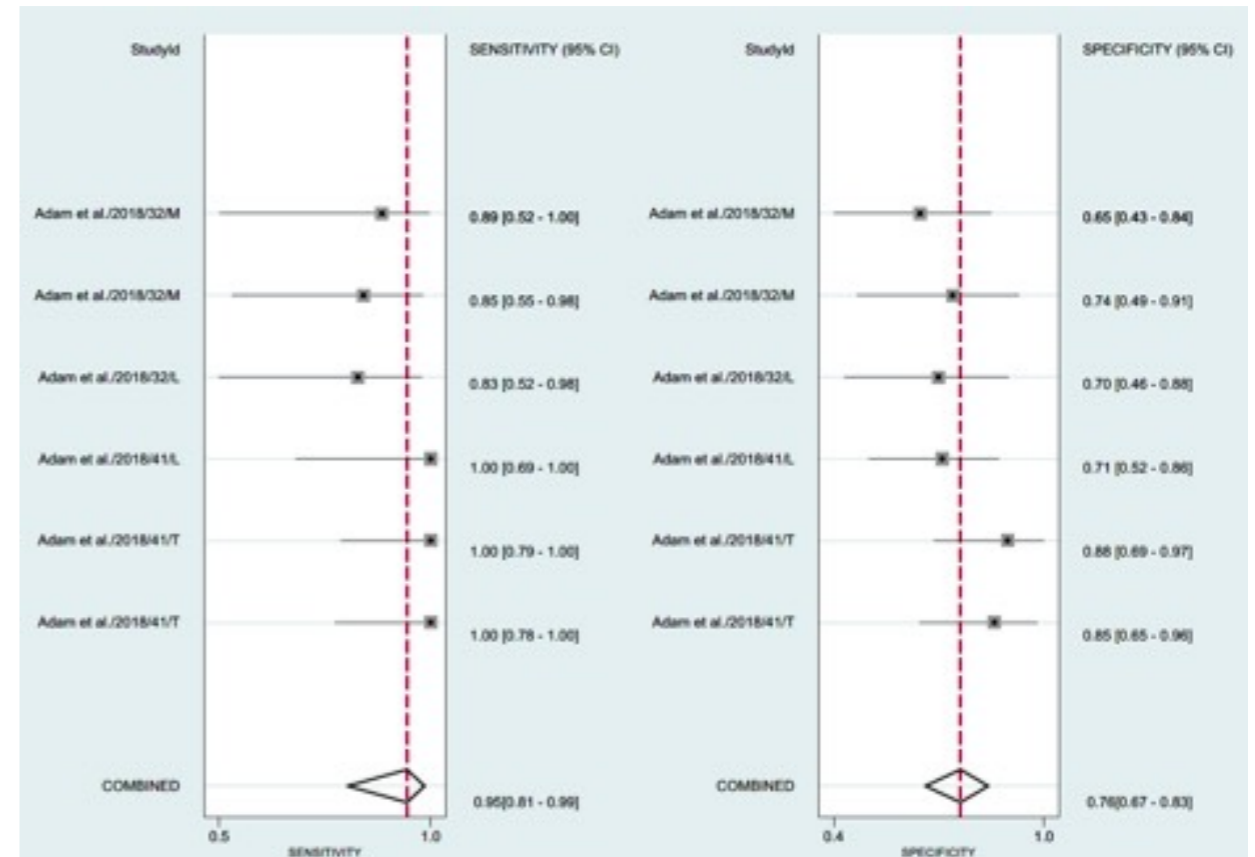

Supplement: 41379_2019_327_MOESM4_ESM.pdf [file 41379_2019_327_MOESM4_ESM.pdf]
