# Supplementary material for: “Interchangeability” of PD-L1 immunohistochemistry assays: a meta-analysis of diagnostic accuracy
Source: PubMed Central journal article supplement (PMC6927905; doi:10.1038/s41379-019-0327-4), 2019-08-05
Supplement: 41379_2019_327_MOESM1_ESM.pdf [file 41379_2019_327_MOESM1_ESM.pdf]

| I declare potential conflict of interest (enter "none" for negative reply or company name(s) for positive reply) for the period of 2013 - Present: |                                                                                                                                                                                    |             |                                     |                                                                                                                |                                                                                                                                                                                                |                              |                                    |                                                               |           |                     |                                                                                |                                            |
|----------------------------------------------------------------------------------------------------------------------------------------------------|------------------------------------------------------------------------------------------------------------------------------------------------------------------------------------|-------------|-------------------------------------|----------------------------------------------------------------------------------------------------------------|------------------------------------------------------------------------------------------------------------------------------------------------------------------------------------------------|------------------------------|------------------------------------|---------------------------------------------------------------|-----------|---------------------|--------------------------------------------------------------------------------|--------------------------------------------|
| Last Name, First Name                                                                                                                              | Board membership or consultancy                                                                                                                                                    | Employment  | Expert testimony                    | Grants/grants pending                                                                                          | Payments for lectures with educational/scientific content                                                                                                                                      | Payments for speakers bureau | Payment for manuscript preparation | Patents (planned, pending, issued)                            | Royalties | Stock/stock options | Other (travel/accommodations/meeting expenses not related to any of the above) | Other (err on the side of full disclosure) |
| Adam, Julien                                                                                                                                       | AstraZeneca, Bayer,BMS, MSD, Roche                                                                                                                                                 | none        | none                                | none                                                                                                           | none                                                                                                                                                                                           | none                         | none                               | none                                                          | none      | none                | none                                                                           | none                                       |
| Barnes, Penny                                                                                                                                      | none                                                                                                                                                                               | none        | none                                | none                                                                                                           | none                                                                                                                                                                                           | none                         | none                               | none                                                          | none      | none                | none                                                                           | none                                       |
| Bigras, Gilbert                                                                                                                                    | Merck, Pfizer, Astrazeneca, BMS, Roche                                                                                                                                             | none        | none                                | Merck and Roche                                                                                                | none                                                                                                                                                                                           | none                         | none                               | none                                                          | none      | none                | none                                                                           | none                                       |
| Chan, Anthony W.H.                                                                                                                                 | none                                                                                                                                                                               | none        | none                                | none                                                                                                           | none                                                                                                                                                                                           | none                         | none                               | none                                                          | none      | none                | none                                                                           | none                                       |
| Chao Li                                                                                                                                            | none                                                                                                                                                                               | none        | none                                | none                                                                                                           | none                                                                                                                                                                                           | none                         | none                               | none                                                          | none      | none                | none                                                                           | none                                       |
| Cheung, Carol                                                                                                                                      | Agilent, Astra-Zeneca, Bristol-Myers-Squibb, Cell Marque/Sigma, Merck, Roche                                                                                                       | none        | none                                | Roche                                                                                                          | Agilent, Astra-Zeneca, Bristol-Myers-Squibb.                                                                                                                                                   | none                         | none                               | none                                                          | none      | none                | none                                                                           | none                                       |
| Chung, Jin-Haeng                                                                                                                                   | none                                                                                                                                                                               | none        | none                                | none                                                                                                           | none                                                                                                                                                                                           | none                         | none                               | none                                                          | none      | none                | none                                                                           | none                                       |
| Couture, Christian                                                                                                                                 | Merck, Pfizer, Astra Zeneca, Boehringer-Ingelheim, Bristol-Meyer-Squibb, Abbvie, Roche, Qiagen                                                                                     | none        | none                                | Merck                                                                                                          | Merck, Pfizer, Novartis                                                                                                                                                                        | none                         | none                               | none                                                          | none      | none                | none                                                                           | none                                       |
| Fiset, Pierre Olivier                                                                                                                              | Consultancy for AstraZeneca Canada, Pfizer Canada and Merck Canada                                                                                                                 | none        | none                                | none                                                                                                           | none                                                                                                                                                                                           | none                         | none                               | none                                                          | none      | none                | none                                                                           | none                                       |
| Fujimoto, Daichi                                                                                                                                   | none                                                                                                                                                                               | none        | none                                | Astrazeneca KK                                                                                                 | AstraZeneca KK, Ono Pharmaceutical Co Ltd, Bristol-Myers Squibb Co Ltd, Taiho Pharmaceutical Co Ltd, Chugai Pharmaceutical Co Ltd, MSD KK, Boehringer Ingelheim Japan Inc, Eli Lilly Japan KK, | none                         | none                               | none                                                          | none      | none                | none                                                                           | none                                       |
| Gilbert, Bigras                                                                                                                                    | Merck, Pfizer, Roche, Bayer, Bristol-Myers Squibb                                                                                                                                  | none        | none                                | Merck, Roche                                                                                                   | none                                                                                                                                                                                           | Merck, Roche                 | none                               | none                                                          | none      | Merck, Roche        | none                                                                           | none                                       |
| Han, Gang                                                                                                                                          | none                                                                                                                                                                               | none        | none                                | none                                                                                                           | none                                                                                                                                                                                           | none                         | none                               | none                                                          | none      | none                | none                                                                           | none                                       |
| Hirsch, Fred R.                                                                                                                                    | Scientific advisory boards: BMS, AstraZeneca, Merck, Lilly, Novartis, Ventana, Genentech/Roche,Helsinn, Loxo, Bayer, HTG molecular, Biocept                                        | none        | none                                | BMS, Genentech, Ventana, Bayer, Amgen, Clovis, Biodesix (all through University of Colorado to my laboratory). | AstraZeneca                                                                                                                                                                                    | none                         | none                               | "EGFR FISH and IHC as predictive biomarkers for EGFR therapy" | none      | none                | none                                                                           | none                                       |
| Ilie, Marius                                                                                                                                       | none                                                                                                                                                                               | none        | none                                | Roche, Boehringer-Ingelheim                                                                                    | Roche, Boehringer-Ingelheim, BMS, AstraZeneca                                                                                                                                                  | none                         | none                               | none                                                          | none      | none                | none                                                                           | none                                       |
| Ionescu, Diana N                                                                                                                                   | ASTRA-ZENECA, PFIZER, ROCHE, ELI-LILLY, NOVARTIS, BMS, MERCK                                                                                                                       | none        | none                                | ASTRA-ZENECA                                                                                                   | ASTRA-ZENECA, PFIZER, ROCHE, ELI-LILLY, NOVARTIS, BMS, MERCK                                                                                                                                   | none                         | none                               | none                                                          | none      | none                | PFIZER                                                                         | none                                       |
| Katsuhiro Okuda                                                                                                                                    | none                                                                                                                                                                               | none        | none                                | none                                                                                                           | none                                                                                                                                                                                           | none                         | none                               | none                                                          | none      | none                | none                                                                           | none                                       |
| Lim, Hyun J.                                                                                                                                       | none                                                                                                                                                                               | none        | none                                | none                                                                                                           | none                                                                                                                                                                                           | none                         | none                               | none                                                          | none      | none                | none                                                                           | none                                       |
| Munari, Enrico                                                                                                                                     | none                                                                                                                                                                               | none        | none                                | none                                                                                                           | none                                                                                                                                                                                           | none                         | none                               | none                                                          | none      | none                | none                                                                           | none                                       |
| Ratcliffe, Marianne                                                                                                                                | none                                                                                                                                                                               | AstraZeneca | none                                | none                                                                                                           | none                                                                                                                                                                                           | none                         | none                               | none                                                          | none      | none                | none                                                                           | none                                       |
| Rimm, David                                                                                                                                        | Amgen, Astra Zeneca, Agendia, Biocept, BMS, Cell Signaling Technology, Cepheid, Daiichi Sankyo, GSK, InVivo/Konica Minolta, Merck, NanoString, Perkin Elmer, PAIGE.AI, and Ultivue | none        | none                                | Astra Zeneca, Cepheid, Navigate Novartis, NextCure, Lilly, Ultivue, Ventana and Perkin Elmer/Akoya             | Ventana                                                                                                                                                                                        | none                         | none                               | AQUA, owned by Yale, CTC licensed to Rarecyte                 | Rarecyte  | Pixelgear           | none                                                                           | none                                       |
| Roge, Rasmus                                                                                                                                       | none                                                                                                                                                                               | none        | none                                | none                                                                                                           | none                                                                                                                                                                                           | none                         | none                               | none                                                          | none      | none                | none                                                                           | none                                       |
| Ross,Catherine                                                                                                                                     | none                                                                                                                                                                               | none        | none                                | none                                                                                                           | Alexion, Celgene, Roche, Janssen, Novartis                                                                                                                                                     | none                         | none                               | none                                                          | none      | none                | none                                                                           | none                                       |
| Scheel, Andreas H.                                                                                                                                 | NordIQ; QuiP                                                                                                                                                                       | none        | BMS, MSD, Roche Pharma, AstraZeneca | none                                                                                                           | BMS, MSD                                                                                                                                                                                       | none                         | none                               | none                                                          | none      | none                | none                                                                           | none                                       |
| Soo, Ross                                                                                                                                          | none                                                                                                                                                                               | none        | none                                | none                                                                                                           | Astra Zeneca, BMS, Boehringer Ingelheim, Celgene, Ignyta, Lilly, Merck, Novartis, Pfizer, Roche, Taiho, Takeda, Yuhan                                                                          | none                         | none                               | none                                                          | none      | none                | none                                                                           | none                                       |
| Swanson, Paul                                                                                                                                      | Astra-Zeneca Canada                                                                                                                                                                | none        | none                                | none                                                                                                           | Pacific Northwest Society of Surgical Pathologists spring 2018 meeting                                                                                                                         | none                         | none                               | none                                                          | none      | none                | none                                                                           | none                                       |
| To, Ka Fai                                                                                                                                         | none                                                                                                                                                                               | none        | none                                | none                                                                                                           | none                                                                                                                                                                                           | none                         | none                               | none                                                          | none      | none                | none                                                                           | none                                       |
| Torlakovic, Emina                                                                                                                                  | Roche, Merck, Pfizer, BMS, Janssen, AstraZeneca                                                                                                                                    | none        | none                                | Roche, Merck, Pfizer, BMS, Janssen, AstraZeneca                                                                | Roche, Merck, Pfizer, BMS, Janssen, AstraZeneca                                                                                                                                                | none                         | none                               | none                                                          | none      | none                | none                                                                           | none                                       |
| Tretlakova, Maria                                                                                                                                  | BMS consultant                                                                                                                                                                     | none        | none                                | none                                                                                                           | none                                                                                                                                                                                           | none                         | none                               | none                                                          | none      | none                | none                                                                           | none                                       |
| Tsao, Ming                                                                                                                                         | Merck, AstraZeneca, BMS, Ventana/Roche                                                                                                                                             | none        | none                                | Merck                                                                                                          | Merck, AstraZeneca                                                                                                                                                                             | none                         | none                               | none                                                          | none      | none                | none                                                                           | none                                       |
| Vainer, Gilad                                                                                                                                      | none                                                                                                                                                                               | none        | none                                | MSD, Roche, Pfizer, AstraZeneca, Abbvie                                                                        | MSD, Roche, Pfizer, AstraZeneca, Abbvie                                                                                                                                                        | none                         | none                               | none                                                          | none      | none                | MSD, Roche, Abbvie                                                             | none                                       |
| Wang, Hangjun                                                                                                                                      | Pfizer, BMS, Merck, AstraZeneca                                                                                                                                                    | none        | none                                | none                                                                                                           | none                                                                                                                                                                                           | none                         | none                               | none                                                          | none      | none                | none                                                                           | none                                       |
| Xu, Zhaolin                                                                                                                                        | Merck Canada National Lung Cancer Medical Advisory Board                                                                                                                           | none        | none                                | none                                                                                                           | none                                                                                                                                                                                           | none                         | none                               | none                                                          | none      | none                | none                                                                           | none                                       |
| Zielinski, Dirk                                                                                                                                    | none                                                                                                                                                                               | none        | none                                | none                                                                                                           | none                                                                                                                                                                                           | none                         | none                               | none                                                          | none      | none                | none                                                                           | none                                       |
